# Supplementary material for: Digital gene expression analyses of mammary glands from meat ewes naturally infected with clinical mastitis
Source: R Soc Open Sci. 2019 Jul 3;6(7):181604. doi: 10.1098/rsos.181604 (PMC6689637; doi:10.1098/rsos.181604)
Supplement: Table S3 [file rsos181604supp3.xlsx]

## Sheet: sheet1
Journal Name: Royal Society Open Science Digital gene expression analyses of mammary glands from meat ewes naturally infected with clinical mastitis Taotao Li1, Jianfeng Gao1, Xingxu Zhao2 and Youji Ma1* 1 College of Animal Science and Technology, and 2 College of Veterinary Medicine, Gansu Agricultural University, Lanzhou, People’s Republic of China
TableS3. A complete list of the differentially expressed transcripts.
Gene_ID	Genes	Clinical1	Clinical2	Clinical3	Normal1	Normal2	Normal3	Mean value of Clinical1 & Clincal2 & Clinical3	Mean value of Normal1 & Normal2 & Normal3	log2(FC)	p_value	FDR
101110874	ABCE1	25.3921	30.8322	16.5672	6.21662	12.797	8.42726	24.2639	9.14697	-1.40744	0.0144	0.049391
101102206	ABHD17B	14.3979	6.5539	4.56481	2.63121	3.12713	2.7612	8.50552	2.83985	-1.58259	0.01205	0.0451953
101119850	ACADS	8.33045	9.44001	8.07368	136.989	11.7273	10.8588	8.61472	53.1917	2.62633	0.00175	0.0155988
101113590	ADAM19	61.7834	5.52513	8.3331	2.89311	3.03264	3.259	25.2139	3.06158	-3.04187	0.00315	0.0230893
101120058	ADAM28	8.42196	3.52712	1.58541	0.0252232	0.914217	0.525573	4.5115	0.488338	-3.20766	0.0002	0.00465806
101111218	ADAM33	0.877422	1.97954	5.52481	31.7186	4.93057	8.86891	2.79392	15.1727	2.44111	0.0095	0.0411952
101118642	ADAMTS12	5.6175	1.08997	1.15334	0.715726	0.50549	0.391044	2.62027	0.53742	-2.28559	0.00255	0.0203436
101110624	ADAMTS17	8.1847	1.00248	7.04086	1.40766	1.09804	0.635323	5.40935	1.04701	-2.36918	0.0019	0.0167293
101122835	ADAMTSL1	0.16394	0.182533	0.385867	7.24337	0.535806	1.03435	0.244113	2.93784	3.58913	5e-05	0.001805
101114037	ADCK3	3.14197	13.8475	4.98659	47.9086	10.8105	25.4151	7.32535	28.0447	1.93676	0.00335	0.0238296
101103604	ADGRL4	10.8524	6.79069	1.90879	0.654707	2.10896	2.65723	6.51728	1.80697	-1.8507	0.0043	0.0277196
105605046	ADIRF	24.8763	90.7141	127.487	8762.68	455.863	306.761	81.0259	3175.1	5.29228	0.0081	0.038475
100170317	ADRA2A	0.613199	1.13698	1.70061	25.2684	2.23149	3.65981	1.15026	10.3866	3.17468	0.00015	0.00361
443107	AGTR1	0.656252	6.49917	4.95467	27.826	5.46329	12.3112	4.0367	15.2002	1.91284	0.00275	0.0210106
101108883	AIFM2	8.71022	5.18058	8.44683	106.343	10.7195	12.0479	7.44588	43.0369	2.53106	0.0087	0.0400089
101108665	ALG5	170.881	60.4407	37.0712	37.1175	31.3833	24.6685	89.4643	31.0564	-1.52642	0.01085	0.0435206
101115787	AOAH	21.4098	0.948946	3.95674	1.29954	2.68403	1.36509	8.77184	1.78289	-2.29866	0.0024	0.0194697
101104557	AOX1	1.1466	6.90649	4.31011	68.9362	1.67977	14.8363	4.12107	28.4841	2.78907	0.0016	0.0147159
101107603	AP3S1	58.2744	30.7863	23.5386	5.52273	20.8397	14.0074	37.5331	13.4566	-1.47985	0.0108	0.043562
101123443	ARHGAP15	12.2173	2.6391	4.95691	0.86522	1.68171	1.28502	6.60444	1.27732	-2.37032	0.0059	0.0326421
101111883	ARID3A	28.0414	2.31795	3.17086	2.41	2.30643	2.24522	11.1767	2.32055	-2.26796	0.00405	0.0269502
101118640	ARL15	9.34704	23.8851	2.88952	2.34247	3.1368	3.87425	12.0406	3.11784	-1.94928	0.0069	0.0355843
100302310	ARL2	10.3298	13.1263	18.3524	86.492	25.2933	23.3684	13.9361	45.0512	1.69274	0.01295	0.0471028
101111823	ARL5B	6.49158	4.16385	1.88214	0.816193	1.84312	1.18543	4.17919	1.28158	-1.7053	0.0061	0.0331143
101107578	ARMCX3	30.376	23.2379	13.9376	4.07525	8.9623	8.14948	22.5172	7.06234	-1.67281	0.0049	0.0293593
101115381	ASGR2	9.94516	7.89145	0.605823	0.840915	0.83943	0.480649	6.14748	0.720331	-3.09326	0.00045	0.00738409
101112801	ASUN	16.408	9.38258	5.71821	2.57508	5.24159	3.24847	10.5029	3.68838	-1.50973	0.0104	0.043154
101108837	ATP8B4	6.20137	2.12793	3.35969	0.782429	1.67154	0.994849	3.89633	1.14961	-1.76098	0.01105	0.0439565
101102027	BACE2	23.9816	1.62276	6.37479	2.64613	3.02567	2.9107	10.6597	2.86083	-1.89766	0.0033	0.0237075
101111740	BCAM	11.724	19.5382	39.3308	277.994	49.3743	59.2404	23.531	128.87	2.45328	0.0117	0.0442272
443485	BCAT1	8.57509	1.25918	1.03295	0.0240608	0.0625933	0.0680378	3.62241	0.051564	-6.13444	5e-05	0.0361
101113939	BCKDHB	5.10155	18.8234	10.8799	103.183	15.7657	11.0277	11.6016	43.3254	1.90088	0.0093	0.0411939
101114560	BCL2A1	77.6242	7.98169	22.1116	4.02201	13.4667	10.7074	35.9058	9.3987	-1.93368	0.0031	0.0229559
101114348	BET1	124.529	33.2679	20.5899	30.9549	17.3537	12.0971	59.4624	20.1352	-1.56225	0.00415	0.0272391
101114507	BIN2	28.3038	24.4702	14.1062	1.17296	11.2676	10.5222	22.2934	7.65424	-1.54228	0.0099	0.0419226
101120189	BIRC3	18.9	26.0508	11.7399	0.882062	6.51149	4.60047	18.8969	3.99801	-2.24079	0.00075	0.00975676
101111241	BLNK	55.7503	3.73098	9.11435	1.34503	5.27914	5.6671	22.8652	4.09709	-2.48048	0.00455	0.0285661
101107523	BMP2K	16.4487	8.2941	4.90088	2.33034	3.86963	3.87321	9.88124	3.35773	-1.55721	0.0093	0.0413206
443175	BMP7	0.329421	0.44655	1.33779	8.26893	2.01353	2.64932	0.704587	4.31059	2.61304	0.00065	0.00869074
100620047	BTG2	69.3244	39.9783	16.8806	16.7983	12.874	10.2459	42.0611	13.3061	-1.6604	0.00485	0.0294261
101105725	BTK	54.5596	4.12107	6.05024	1.63793	2.32961	2.89438	21.577	2.2873	-3.23777	5e-05	0.0240667
101105056	BZW1	99.2051	37.3025	30.7607	21.6906	20.5463	16.6696	55.7561	19.6355	-1.50567	0.0095	0.0414441
101110349	C12H1orf27	15.1084	12.225	5.66747	2.34311	3.84436	4.03316	11.0003	3.40688	-1.69102	0.01155	0.0442393
101122553	C16H5orf28	16.3346	13.1666	3.60386	1.40265	4.21975	4.01183	11.035	3.21141	-1.78081	0.0056	0.0319621
101120567	C1GALT1	8.32202	3.34867	2.33427	1.81022	1.61143	1.51949	4.66832	1.64705	-1.50302	0.0106	0.0434841
101116190	C1H21orf91	14.5094	3.35811	2.86309	2.88358	2.08712	1.96147	6.9102	2.31072	-1.58038	0.0061	0.0329903
101102801	C1QTNF6	30.3605	1.95569	17.2834	1.44475	5.03611	1.36973	16.5332	2.61686	-2.65945	0.0002	0.00458413
101108131	C3	86.6721	69.1809	28.0768	21.1247	10.083	14.2378	61.3099	15.1485	-2.01695	0.00115	0.0125803
101115803	CAB39L	16.8325	4.21758	3.36798	1.62404	2.38541	4.33409	8.13937	2.78118	-1.54922	0.01325	0.0475945
101109260	CCDC91	6.76681	31.1075	6.56517	2.39687	5.9744	4.70278	14.8132	4.35801	-1.76514	0.0122	0.0452874
101119957	CCL21	1.02939	19.7815	38.7844	63.9842	48.6519	136.484	19.8651	83.0401	2.06357	0.00145	0.013685
101118334	CCNYL1	12.8683	39.2289	7.67113	7.52951	6.36901	5.19654	19.9228	6.36502	-1.64618	0.0112	0.0435925
105601860	CCPG1	21.8292	26.7729	9.7082	2.93515	5.6944	6.14891	19.4368	4.92616	-1.98026	0.0047	0.0290034
101111510	CD19	15.7391	1.52726	1.3123	0.26374	0.413348	0.393403	6.19289	0.35683	-4.1173	5e-05	0.01805
101114260	CD27	136.402	4.53055	13.0527	2.03898	5.01435	7.31629	51.3283	4.78987	-3.4217	0.00195	0.0170655
101112271	CD53	231.208	17.6933	27.596	24.1697	18.5119	21.7161	92.1657	21.4659	-2.10218	0.00445	0.0283075
101120257	CD55	7.55729	29.7031	3.68808	2.66564	2.78695	3.53675	13.6495	2.99645	-2.18752	0.0077	0.037437
101105681	CD79A	65.5871	4.59039	10.238	1.72719	5.24316	8.2618	26.8052	5.07738	-2.40035	0.00465	0.028818
101104586	CD79B	66.2809	2.18135	5.05368	0.430752	1.30678	1.41608	24.5053	1.0512	-4.54298	5e-05	0.01444
101102378	CDA	8.22532	1.34695	2.97331	0.17943	2.13683	1.41596	4.18186	1.24407	-1.74907	0.0107	0.0435234
101105034	CDCP1	13.9865	36.7133	5.6251	0.145187	9.44959	5.57618	18.775	5.05698	-1.89246	0.01015	0.0427306
101122426	CDK17	18.7387	12.5111	6.2096	2.54362	5.42271	5.63634	12.4865	4.53422	-1.46144	0.0123	0.0454251
101115093	CDV3	154.399	105.27	36.9866	36.3459	33.4107	27.7589	98.885	32.5052	-1.60508	0.009	0.0407398
101110612	CEBPG	35.8314	64.9279	11.9911	11.6661	9.68018	7.73137	37.5835	9.69254	-1.95515	0.00485	0.0293029
101117883	CFAP100	0.280891	0.719529	1.45449	9.65316	1.72797	3.04037	0.818305	4.80717	2.55448	0.0038	0.0256411
101108520	CKMT1A	0.101673	10.2536	7.8402	0.446859	2.37509	1.14432	6.06517	1.32209	-2.19773	0.00565	0.0321205
101113649	CLDN11	2.48136	0.909092	1.64175	15.8269	1.78436	3.22509	1.6774	6.94546	2.04984	0.00815	0.0385856
101104478	CLEC4A	27.017	5.73609	3.83071	1.63341	2.23366	2.28351	12.1946	2.0502	-2.57241	0.00015	0.00408679
101104735	CLEC4D	32.6543	1.77845	1.00286	0.235753	0.460792	0.139248	11.8119	0.278598	-5.40591	5e-05	0.0120333
100135686	CLEC4E	37.1232	2.55215	1.4104	0.319523	0.588978	1.19643	13.6952	0.701644	-4.28679	5e-05	0.0103143
101111012	CLEC5A	7.60527	2.48492	0.938699	0.209146	0.52908	0.228553	3.6763	0.32226	-3.51196	0.00045	0.00730112
678675	CLEC6A	17.1908	3.3198	5.54346	0.388636	1.43194	1.41256	8.68468	1.07771	-3.0105	0.0008	0.0103143
101106761	CLSTN3	0.690863	1.25996	2.06943	178.135	8.61174	3.80418	1.34008	63.5171	5.56675	5e-05	0.00176098
101106892	CMPK1	80.0923	60.6106	27.1611	17.9032	21.7033	12.7329	55.9547	17.4465	-1.68132	0.0035	0.0244155
100233164	CNGA3	6.72193	0.406494	2.89533	0.968719	0.297949	0.455721	3.34125	0.574129	-2.54094	0.0142	0.0492904
443483	COL1A1	3326.65	127.67	2663.84	507.727	508.784	65.87	2039.39	360.794	-2.49889	0.0041	0.0270338
101105413	CORO2B	1.41902	2.62512	3.25404	43.6398	5.48701	3.35881	2.43273	17.4952	2.84631	0.00125	0.0129856
101110092	CPEB1	1.32554	0.743247	1.77842	10.6237	2.20799	2.9418	1.2824	5.25782	2.03562	0.0037	0.0250836
101110448	CPEB4	10.8826	15.5761	3.75967	2.76102	2.66085	3.21696	10.0728	2.87961	-1.80652	0.00355	0.0245273
101114834	CREG1	144.157	88.7612	34.804	35.0942	26.0491	25.173	89.2408	28.7721	-1.63303	0.00585	0.0326154
101118070	CSF3R	5.60805	1.98685	0.28845	0.0250519	0.0796841	0.186558	2.62778	0.0970981	-4.75826	0.00015	0.00401111
101102181	CTAGE5	23.5544	15.7679	8.6648	2.6275	6.58693	6.36094	15.9957	5.19179	-1.62338	0.0049	0.0294817
101121943	CTHRC1	163.048	8.72756	33.8696	0.929408	1.08912	0.179036	68.5485	0.732521	-6.54811	5e-05	0.009025
101113725	CTSL	220.639	11.5891	3.20045	2.81898	1.23715	1.28841	78.4762	1.78151	-5.46108	5e-05	0.00802222
101111100	CXCL13	15.8963	2.44523	10.2005	0.153431	3.6482	0.90645	9.51403	1.56936	-2.59988	0.0027	0.0208492
101110214	CXCR2	4.26148	2.05967	0.644005	0.0327927	0.399188	0.335081	2.32172	0.255687	-3.18274	0.0006	0.00849412
100036757	CYBB	54.734	11.5196	9.54274	2.08776	5.7658	6.4076	25.2655	4.75372	-2.41004	0.0024	0.0195797
101113467	CYTIP	22.4545	7.44386	2.62825	0.232285	1.13798	1.77275	10.8422	1.04767	-3.3714	5e-05	0.00722
101103274	DAAM2	1.11059	1.59035	2.44223	9.09828	3.01223	6.39147	1.71439	6.16733	1.84695	0.007	0.035844
101109436	DENND5B	4.0286	1.3981	1.69887	0.290945	1.0007	0.767414	2.37519	0.686352	-1.79102	0.0072	0.0363524
101110877	DERL3	182.842	13.9794	17.1696	1.13122	6.2429	5.77488	71.3305	4.383	-4.02453	0.00025	0.00555385
101102664	DHODH	3.31666	3.43513	3.83402	21.4262	6.05544	3.88021	3.5286	10.454	1.56688	0.0124	0.0456776
101103158	DHRS7	13.8879	20.2262	16.4725	291.417	27.9349	33.3423	16.8622	117.565	2.80159	0.0023	0.0190874
101120807	DHRS9	6.20562	1.55898	0.728572	0.145208	0.200575	0.185719	2.83106	0.177167	-3.99816	0.00035	0.00623951
100310793	DIO2	21.4062	59.3439	3.25144	0.0416599	1.64358	2.93012	28.0005	1.53846	-4.1859	0.0003	0.00601667
101117729	DMTN	0.302835	1.90876	1.81838	5.7774	2.79905	6.29531	1.34332	4.95725	1.88373	0.0088	0.0399597
101113840	DNAJB9	61.8934	15.558	5.64251	3.82728	2.10975	2.64656	27.698	2.8612	-3.27509	5e-05	0.00656364
101110685	DNAJC3	80.6979	81.1101	24.1927	5.99782	14.3666	11.2705	62.0002	10.545	-2.55572	0.0003	0.00593425
101110863	DPEP2	130.928	3.62174	10.337	0.195071	1.83873	2.18322	48.2956	1.40567	-5.10256	5e-05	0.00601667
101108962	DQA	8.81242	64.1704	114.878	4.92521	2.66999	0	62.6202	2.53173	-4.62843	0.0001	0.00307234
101112523	DRAM2	42.0878	12.7985	12.248	5.23685	10.7168	5.6195	22.3781	7.19105	-1.63781	0.01165	0.0443868
101111144	EAF2	19.1831	4.29454	3.74839	0.14172	1.68199	1.20794	9.07535	1.01055	-3.16681	0.0014	0.0137524
443139	EDNRB	6.33578	7.9232	1.3862	1.14412	2.22601	1.15035	5.21506	1.50683	-1.79117	0.0062	0.0332818
101110042	EIF2AK3	33.3931	15.4717	11.3509	5.08717	6.85655	6.43306	20.0719	6.12559	-1.71226	0.0049	0.029238
106990093	EIF2S2	35.3846	74.7576	16.9552	14.53	13.4161	10.1332	42.3658	12.6931	-1.73886	0.0094	0.0413829
101107857	ELFN2	5.37186	0.455964	1.42005	0.0342556	0.304478	0.30104	2.41596	0.213258	-3.50193	0.0006	0.00841165
101101983	ELL2	12.8232	15.2317	3.03606	1.70422	1.7289	2.11387	10.3636	1.849	-2.48672	5e-05	0.00555385
101106654	EPHX2	1.71136	3.03691	5.62525	36.9283	8.80612	7.0796	3.45784	17.6047	2.34802	0.00085	0.0107667
780519	ERBB2	1.77075	7.92742	13.5287	23.2996	20.4325	31.3144	7.74227	25.0155	1.69199	0.0036	0.024637
101108735	ERGIC2	28.2376	18.5081	7.99313	4.96628	6.75099	4.75583	18.2463	5.49103	-1.73245	0.0027	0.0209613
101104137	ERLEC1	195.152	56.9184	25.6813	12.6056	17.7065	16.6849	92.5838	15.6656	-2.56316	0.00015	0.00393818
101109883	ERO1A	24.0848	25.0449	5.18071	4.06609	3.5171	3.72087	18.1035	3.76802	-2.26439	0.00055	0.00818763
101122251	ERP44	69.5754	21.1536	14.5813	10.3518	9.68571	8.12231	35.1034	9.38659	-1.90294	0.0011	0.0123132
101120755	FABP7	40.2442	0.690342	1.66669	0.261637	0.50553	0.622698	14.2004	0.463288	-4.93788	0.00025	0.0054697
101108149	FAM107B	108.665	19.1376	16.7966	4.56367	8.51206	12.6161	48.1998	8.56393	-2.49268	0.0003	0.00585405
101108716	FAM213A	7.51247	24.2073	26.4718	132.663	38.096	22.015	19.3972	64.2581	1.72803	0.01375	0.048309
101120767	FAM213B	7.06721	6.7069	8.57038	36.4391	25.1528	22.5469	7.44816	28.0463	1.91285	0.00325	0.023465
101109320	FAM234A	5.28049	14.7379	13.2719	79.7121	28.4515	23.3792	11.0968	43.8476	1.98236	0.01055	0.0434023
101103469	FAM3C	82.6269	15.3046	16.4404	9.57268	9.58674	8.74054	38.124	9.29999	-2.0354	0.00035	0.00616341
101108706	FAM46C	237.652	18.8336	9.93123	3.28728	3.96748	4.96398	88.8055	4.07291	-4.44652	0.00035	0.00608916
101113028	FAM78B	6.37507	10.1208	2.49669	1.41004	1.05462	1.65427	6.33087	1.37298	-2.2051	0.00205	0.0176202
101106492	FAP	141.194	12.4189	36.6576	6.23227	15.9186	12.6746	63.4234	11.6085	-2.44984	0.00025	0.00538806
101118665	FGL1	1.22964	5.78633	3.01551	18.8102	2.36959	14.1081	3.34383	11.7627	1.81464	0.011	0.0438785
101107464	FHOD1	5.89193	9.43167	7.85496	82.7973	9.64396	12.6708	7.72619	35.0373	2.18107	0.0141	0.0491797
101108768	FITM2	4.60613	6.32727	7.74724	139.089	9.57472	8.11914	6.22688	52.261	3.06915	0.005	0.0297119
101103798	FKBP11	172.534	115.435	54.7074	17.3512	37.9169	28.9979	114.225	28.0887	-2.02382	0.00385	0.0258577
101115134	FNDC3A	31.695	38.032	11.2603	4.07897	10.3543	10.1826	26.9958	8.2053	-1.7181	0.0127	0.0464273
101114406	FNDC3B	27.5782	9.1372	11.5937	4.74319	7.29893	6.01246	16.103	6.01819	-1.41993	0.01215	0.045218
101106923	FOXN2	8.39229	8.85258	2.33511	2.69355	1.31832	1.28737	6.52666	1.76641	-1.88552	0.00315	0.0232071
101101932	FZD4	8.33448	14.2887	6.8089	82.1359	7.95157	28.6287	9.81068	39.5721	2.01206	0.0114	0.0438976
101108754	GALK2	45.5338	12.4518	9.31454	4.17801	7.63947	5.74952	22.4334	5.85567	-1.93774	0.00345	0.0241835
101113458	GALNT15	3.76683	0.770587	3.26519	43.1715	0.660019	7.24842	2.60087	17.0266	2.71073	0.0074	0.0368469
101122727	GATSL3	9.94395	9.60982	10.8321	71.7707	14.5054	14.2688	10.1286	33.515	1.72637	0.01465	0.0498929
101122284	GJA1	99.2394	9.30827	44.1607	17.639	10.5518	9.21609	50.9028	12.469	-2.0294	0.00135	0.0135375
101115130	GJB7	31.8773	2.45983	2.28328	0.0883159	0.264932	0.599483	12.2068	0.317577	-5.26444	5e-05	0.00515714
101118587	GK	21.7783	34.8628	1.5724	0.627147	0.982398	0.819321	19.4045	0.809622	-4.583	5e-05	0.00481333
101122583	GLS	47.4296	12.2504	16.0137	8.07783	8.94673	8.10167	25.2312	8.37541	-1.59098	0.0132	0.0475332
101115460	GNPNAT1	30.2408	6.58143	5.75108	4.5955	3.51627	2.28319	14.1911	3.46499	-2.03407	0.00055	0.00810408
101115143	GPCPD1	25.2916	45.3314	6.90641	8.27476	5.29808	7.06731	25.8431	6.88005	-1.90929	0.01425	0.0491098
101111492	GPR68	2.21384	18.4022	4.32199	0.104217	2.06399	2.2201	8.31269	1.46277	-2.50661	0.0009	0.0112034
101102396	GREM1	29.2259	6.73426	21.0772	1.54294	8.11789	7.21124	19.0125	5.62402	-1.75727	0.0048	0.0293695
443054	GSTA1-1	0.361664	1.29505	2.99227	44.2025	4.23208	4.17476	1.54966	17.5364	3.50033	0.00045	0.0069871
100037663	GSTM3	14.5847	28.8202	41.3651	807.182	77.2866	96.829	28.2567	327.099	3.53306	0.00135	0.0134441
100885767	GYPC	9.49934	9.23992	17.9456	49.3125	28.4195	27.0146	12.2283	34.9155	1.51365	0.0085	0.0399805
101109622	HBS1L	36.0715	50.3624	13.2142	6.84423	10.8561	7.82819	33.216	8.50949	-1.96473	0.00385	0.025738
101122425	HOXC10	0.446254	0.0572827	1.59421	7.01151	2.32148	1.12545	0.699247	3.48615	2.31776	0.0111	0.0436741
101108379	HOXC11	1.17515	0.150456	0.934059	8.58985	1.20322	1.6415	0.753223	3.81152	2.33922	0.0074	0.0369744
101118151	HSPA13	42.0729	10.0712	7.51308	3.75335	5.12994	4.34683	19.8857	4.41004	-2.17287	0.0003	0.005776
101104194	IDE	8.99002	10.148	5.49375	3.18552	3.75257	1.96864	8.21059	2.96891	-1.46755	0.01205	0.0450782
101106828	IFI6	37.9103	11.3218	25.1782	679.759	85.1037	40.7358	24.8035	268.533	3.43649	0.0045	0.0283755
101103308	IL1R2	37.8003	20.0309	0.736408	0.131776	0.366987	0.207148	19.5225	0.235304	-6.37447	5e-05	0.0045125
780505	IL1RN	43.769	4.10837	4.14343	1.08915	1.24802	2.93253	17.3403	1.75657	-3.30329	5e-05	0.00424706
101103538	IL2RG	127.704	13.978	32.9415	10.2257	17.1544	22.0828	58.208	16.4876	-1.81983	0.014	0.0489492
101107292	INTS2	8.5711	4.19293	3.03545	1.23363	2.43801	1.54749	5.26649	1.73971	-1.598	0.0079	0.0380253
101122737	IPP	9.66176	5.30119	2.85101	1.1564	2.53039	1.36955	5.93799	1.68545	-1.81684	0.0058	0.032462
101111234	IRF4	51.9215	7.03126	7.86864	1.12645	3.44959	4.26174	22.2738	2.94593	-2.91855	0.00865	0.0401627
443057	ISG15	28.139	1.40794	3.75526	98.9306	19.4559	18.2644	11.1007	45.5503	2.03681	0.0133	0.0474202
101116513	ISG20	28.5888	2.81878	4.65186	0.742703	2.27977	2.05303	12.0198	1.69183	-2.82876	0.001	0.0118361
101115445	ITGA7	2.62396	3.48724	6.18658	73.2519	4.83537	7.02173	4.09926	28.3697	2.79091	0.00565	0.0318695
443143	ITGAV	58.8869	28.103	15.6999	4.98867	10.5454	8.3264	34.2299	7.95348	-2.1056	0.0005	0.0076
101108959	ITIH4	0.420572	1.43891	1.14576	6.69088	1.30086	2.98298	1.00175	3.65824	1.86863	0.0096	0.0413803
101114543	ITIH5	0.342014	3.4703	4.78006	17.7304	3.59128	7.3711	2.86413	9.56427	1.73956	0.00645	0.0341165
780486	JAG1	3.16761	5.37496	7.86571	27.1722	11.4662	10.5803	5.46943	16.4062	1.58478	0.007	0.0357173
101118139	KBTBD8	8.82982	6.4661	2.07138	0.883021	0.902672	0.564344	5.7891	0.783346	-2.88562	0.00045	0.00722
101110698	KCNK6	22.417	26.7776	7.12516	1.54315	4.53807	4.07389	18.7733	3.38504	-2.47144	0.00015	0.00386786
101103926	KIF7	1.73561	1.26232	2.77611	9.76197	4.03491	4.44501	1.92468	6.08063	1.6596	0.00865	0.0399061
100302636	KLF4	0.886262	1.90682	3.40423	32.5451	2.08258	8.2883	2.06577	14.3053	2.7918	0.0001	0.00277692
101106208	KLHDC8B	2.96382	1.84224	3.71088	19.304	3.46889	4.85886	2.83898	9.21057	1.69792	0.0133	0.0476556
101114005	KRAS	13.2731	16.0686	8.15784	3.43817	4.81947	5.15662	12.4998	4.47142	-1.48311	0.01155	0.0441222
101118601	LARP4	10.3573	11.5644	4.80866	2.2314	3.99751	3.62159	8.91011	3.2835	-1.44021	0.0132	0.047652
443089	LDHA	910.671	31.4164	78.2867	48.9115	41.2267	31.3555	340.125	40.4979	-3.07014	0.00765	0.0374461
101111679	LIPG	0.359393	5.25707	2.60516	107.862	4.60871	4.71222	2.74054	39.0609	3.83319	0.00135	0.0133521
101120285	LIPM	0.443817	8.64596	2.23587	0.0233513	0.13112	0.0861405	3.77522	0.080204	-5.55674	0.0003	0.0057
101104881	LMTK2	123.258	33.0811	8.02678	0.498337	2.7523	6.33538	54.7885	3.19534	-4.09983	5e-05	0.00401111
101103133	LOC101103133	74.5728	138.635	41.7059	38.694	20.5545	25.4801	84.9713	28.2429	-1.58909	0.01125	0.0436694
101103238	LOC101103238	37.2045	33.7585	5.81545	0.461084	0.543605	0.387075	25.5928	0.463921	-5.78571	5e-05	0.0038
101103771	LOC101103771	4979.66	37.4383	664.114	2.35045	3.2335	2.70654	1893.74	2.7635	-9.42053	5e-05	0.00361
101104568	LOC101104568	0.0704136	0.314076	0.626438	89.3425	2.25973	0.772576	0.336976	30.7916	6.51375	5e-05	0.00171905
101105359	LOC101105359	46.5648	2.1077	5.53809	0.430365	2.01062	1.32362	18.0702	1.25487	-3.848	0.0003	0.00562597
101105553	LOC101105553	30.2237	27.7555	8.85974	7.84746	8.3525	6.14132	22.2797	7.44709	-1.58098	0.0111	0.0437934
101105651	LOC101105651	0.390689	0.856199	1.61444	112.4	4.09358	2.10872	0.953776	39.5342	5.37331	5e-05	0.00167907
101106466	LOC101106466	1.43511	2.112	2.52854	11.3713	4.04885	6.85426	2.02522	7.4248	1.87427	0.01095	0.0438
101108374	LOC101108374	6.16536	0.582687	2.26352	27.8821	31.5142	23.6898	3.00385	27.6954	3.20476	0.0094	0.0412571
101110341	LOC101110341	2.30078	5.29002	1.13419	0.157502	0.824045	0.336687	2.90833	0.439411	-2.72655	0.00135	0.0136322
101110974	LOC101110974	2.66372	9.35871	0.294932	0.510025	0.313869	0.900479	4.10579	0.574791	-2.83655	0.0006	0.00833077
101111946	LOC101111946	152.567	326.999	105.737	74.2315	53.0388	63.6661	195.101	63.6455	-1.61609	0.00695	0.0357146
101112306	LOC101112306	8.50027	3.50795	3.9443	0.299978	2.43177	1.69827	5.3175	1.47668	-1.8484	0.00475	0.0291872
101112384	LOC101112384	0.198573	1.65045	3.97714	121.229	3.79196	4.49211	1.94205	43.171	4.47441	5e-05	0.00164091
101113219	LOC101113219	19.16	260.798	145.943	21.7591	17.797	19.4611	141.967	19.6724	-2.85131	5e-05	0.0034381
101115343	LOC101115343	0.197902	0.868017	1.25755	7.67143	0.917276	3.39012	0.774491	3.99294	2.36613	0.00295	0.0219577
101115527	LOC101115527	0.10778	1.31499	1.26326	19.1014	3.88909	5.24043	0.895345	9.4103	3.39373	0.0009	0.010921
101115927	LOC101115927	0.170383	1.40277	3.2666	11.0256	2.36378	3.13518	1.61325	5.50817	1.77161	0.00875	0.0401111
101117706	LOC101117706	17.5861	2.77548	4.79144	1.47807	2.08547	2.43287	8.38433	1.9988	-2.06856	0.00095	0.0114317
101117971	LOC101117971	25.8089	3.05683	6.39038	4.00142	3.37944	3.98991	11.752	3.79026	-1.63254	0.013	0.0471658
101120093	LOC101120093	63.4686	9.06145	27.9496	6.12208	10.266	5.28626	33.4932	7.22479	-2.21284	0.0006	0.00825143
101121080	LOC101121080	60.1534	22.2131	11.63	2.88897	4.20823	4.58313	31.3322	3.89344	-3.00853	0.00025	0.00530882
101121539	LOC101121539	0.0491977	5.43189	2.01006	163.864	2.01792	10.961	2.49705	58.9475	4.56113	0.0003	0.00548354
101121664	LOC101121664	16.1867	13.2167	5.78918	1.77695	4.71012	4.26445	11.7309	3.58384	-1.71073	0.01385	0.0485422
105602454	LOC105602454	2.16262	3.32275	2.11955	0.414198	0.171866	0.144928	2.53497	0.243664	-3.37901	0.0002	0.0045125
105603269	LOC105603269	0.370034	0.693657	1.61335	16.7611	2.10475	3.06594	0.892348	7.31061	3.03431	0.00055	0.00786337
105604171	LOC105604171	695.58	1082.9	32.8105	0.391646	29.2171	2.95975	603.764	10.8562	-5.7974	0.00045	0.00714066
105605733	LOC105605733	3.85462	9.93759	1.48217	1.74557	1.38775	1.00772	5.09146	1.38035	-1.88305	0.0134	0.047542
105605818	LOC105605818	18.014	35.1575	14.0907	6.96537	6.48629	8.0283	22.4207	7.15999	-1.6468	0.00535	0.0310257
105605927	LOC105605927	1180.85	1375.28	412.699	344.546	201.423	210.799	989.608	252.256	-1.97197	0.0012	0.0128356
105606081	LOC105606081	26.4546	2.07837	45.0762	10.8102	1.82288	5.2498	24.5364	5.96097	-2.0413	0.0095	0.0413193
105610135	LOC105610135	9.60433	0.173575	2.04893	0.0614783	0.23402	0.274299	3.94228	0.189933	-4.37547	5e-05	0.00328182
105611978	LOC105611978	26.444	1.02226	4.8898	1.84606	1.81783	1.40956	10.7853	1.69115	-2.67299	0.00455	0.0283198
105615035	LOC105615035	8.04623	4.00896	2.66664	1.10308	1.99254	2.11954	4.90728	1.73839	-1.49717	0.00925	0.0413529
105615470	LOC105615470	19.8064	3.59348	2.06696	1.16544	1.83768	0.977062	8.48895	1.32673	-2.67772	0.0062	0.033406
105616335	LOC105616335	32.2186	1.82974	12.0938	2.01319	2.81019	0.947674	15.3807	1.92368	-2.99918	0.0007	0.00927339
105616883	LOC105616883	3.32151	8.30846	4.12168	49.4877	5.78513	8.4839	5.25055	21.2523	2.01708	0.01025	0.0429014
105616898	LOC105616898	7.82702	7.56218	13.6351	128.132	20.9295	21.5492	9.67476	56.8702	2.55537	0.00445	0.0281833
106991118	LOC106991118	16.8684	3.6937	3.70166	2.18459	2.93688	2.05448	8.08792	2.39198	-1.75756	0.006	0.0328182
443475	LOC443475	214.804	214.632	68.1184	55.5022	30.9111	43.0566	165.851	43.1566	-1.94224	0.00865	0.040034
101118717	LPGAT1	15.2276	8.96523	6.20229	2.65865	4.73615	3.1722	10.1317	3.52233	-1.52427	0.0063	0.033569
101105972	LRIF1	7.32395	6.45656	2.62793	1.48324	1.84466	1.82092	5.46948	1.71627	-1.67212	0.01035	0.0431948
101113578	LRMP	17.8458	2.6777	3.0151	0.159266	1.01556	1.18787	7.84622	0.787563	-3.31653	5e-05	0.00313913
101121640	LRRC8C	4.1951	4.2447	1.44819	0.614782	1.16403	1.01699	3.296	0.931934	-1.82242	0.0044	0.0281133
101108235	LY96	42.74	19.9533	7.4733	10.1525	5.93889	7.67512	23.3889	7.92218	-1.56185	0.0067	0.0349271
101106842	LYSMD3	20.608	10.7046	4.41202	1.98826	3.07714	4.30221	11.9082	3.12254	-1.93116	0.0013	0.0134086
101103009	LYVE1	3.47613	6.3449	3.26479	30.576	2.05175	10.3657	4.36194	14.3311	1.71611	0.0066	0.034656
100049062	LYZ	64.1132	7.60355	16.5328	2.21477	7.2363	4.83237	29.4165	4.76115	-2.62724	0.00175	0.0156957
101103326	MAN1A1	89.6416	13.9633	14.3537	9.60909	4.79366	4.87346	39.3195	6.42541	-2.61339	0.0001	0.00300833
101116572	MAN2A1	23.7132	29.2624	20.3127	3.0456	11.286	10.5443	24.4294	8.29198	-1.55883	0.01105	0.0437156
101106659	MAOB	0.561404	2.80915	6.09389	33.3293	6.84587	10.14	3.15481	16.7717	2.41041	0.0034	0.0239493
101103324	MAPK6	23.3684	19.1032	9.9567	1.61926	7.36052	3.81726	17.4761	4.26568	-2.03454	0.00115	0.0124857
101106078	MARCH1	5.45831	1.65283	1.42311	0.0729856	0.544322	0.547624	2.84475	0.38831	-2.87302	0.0009	0.0113009
101108412	MATN4	0.342858	0.787447	1.19827	5.85098	2.05113	0.763579	0.776191	2.88856	1.89587	0.0141	0.0490612
101108469	MCFD2	15.6426	74.442	14.8625	11.4022	13.1089	9.08305	34.9824	11.198	-1.64338	0.0143	0.0491648
101108043	MDFIC	15.2575	24.3453	7.53321	1.99928	5.54855	6.58428	15.712	4.7107	-1.73785	0.00545	0.0312294
100189620	ME1	12.4905	29.8435	5.43555	8.59133	3.71161	2.46254	15.9232	4.92182	-1.69386	0.01085	0.0436418
100286738	MEF2C	21.4629	4.52	3.96659	1.93287	1.75462	1.96861	9.98317	1.88537	-2.40465	5e-05	0.00300833
101122450	METTL2A	72.2629	11.7441	13.804	11.7766	11.4976	9.02901	32.6037	10.7677	-1.59832	0.0086	0.040189
101123204	MGAT3	14.5224	1.32232	2.11501	0.0243591	1.62086	0.898949	5.98656	0.848055	-2.8195	0.0013	0.0133135
101108820	MGAT4A	6.80692	11.2148	2.67127	1.26165	1.57118	2.81081	6.89766	1.88121	-1.87445	0.01075	0.0436039
101114312	MGLL	4.46253	20.1921	12.3361	101.401	9.67576	25.2385	12.3302	45.4383	1.88171	0.01305	0.0472286
102466405	MIR21	60.3633	11.9688	13.0822	7.53462	5.5996	4.91974	28.4714	6.01799	-2.24216	0.0009	0.0111077
101115526	MOB1A	44.4776	19.8117	15.8309	7.36495	12.0663	10.4461	26.7067	9.95911	-1.42312	0.00965	0.041472
101120614	MS4A8	64.57	5.16871	4.4633	2.54534	0.597313	1.07496	24.734	1.40587	-4.13696	5e-05	0.002888
101121679	MSH3	7.04266	21.6059	3.0439	0.563355	3.54489	2.03429	10.5641	2.04751	-2.36723	0.00235	0.0192807
101102321	MSI2	28.3936	39.3709	10.8902	3.37512	9.08659	6.59119	26.2182	6.35097	-2.04552	0.00685	0.035453
101121628	MSMO1	40.847	406.548	32.1493	22.5488	19.8789	16.8705	159.848	19.7661	-3.0156	0.01185	0.0445609
101121746	MSR1	53.2078	7.86316	5.7947	2.36274	5.99669	4.4584	22.2885	4.27261	-2.38311	0.0005	0.00752083
101108693	MUSTN1	0.196593	12.1186	6.13778	102.801	4.432	17.1797	6.151	41.4709	2.75321	0.0015	0.0139742
443146	MX1	7.70133	3.33068	6.59044	33.0059	14.3181	12.9027	5.87415	20.0756	1.77299	0.0029	0.0219246
101121392	MYCL	10.4429	0.753052	2.17564	0.217244	1.45758	1.22075	4.45719	0.965192	-2.20725	0.00755	0.0373363
101118080	NABP1	16.3517	5.41094	3.40459	2.82747	2.92693	1.57912	8.38907	2.44451	-1.77897	0.01225	0.0453564
101117878	NADK2	18.8169	4.77419	3.31512	2.61864	3.53744	2.70739	8.96873	2.95449	-1.602	0.01075	0.0434818
101110450	NAIP	3.5288	2.24408	1.7979	0.173574	1.04317	0.334209	2.52359	0.516985	-2.28729	0.0033	0.0235901
101115286	NBN	15.1923	11.7726	6.84156	1.65217	5.34173	4.58879	11.2688	3.8609	-1.54533	0.0098	0.041744
101106094	NCF2	20.3546	4.11187	4.08878	2.2875	2.92161	2.88868	9.51842	2.69926	-1.81816	0.0086	0.0403195
101108832	NDNF	0.174782	0.334862	0.735099	1.43607	2.56352	3.85966	0.414914	2.61975	2.65854	0.00035	0.00594588
101118667	NEIL2	6.76024	15.3676	7.9842	46.592	23.3397	21.2918	10.0374	30.4078	1.59906	0.0063	0.0334456
101122164	NGLY1	76.9058	22.1707	16.5106	12.9653	11.9124	10.6597	38.529	11.8458	-1.70157	0.00455	0.0284424
101109849	NME4	8.64198	13.5451	20.8122	179.637	39.5791	31.9247	14.3331	83.7135	2.54611	0.00105	0.0118453
101105161	NREP	134.104	43.241	37.8723	4.28453	22.1639	8.22113	71.7389	11.5565	-2.63405	5e-05	0.00277692
101114639	NUCB2	29.2061	14.2985	7.61154	0.803758	4.14325	2.16395	17.0387	2.37032	-2.84567	5e-05	0.00267407
101115365	NUDT12	3.14813	18.2373	1.81493	0.477108	1.80212	1.36543	7.73346	1.21489	-2.67029	0.0014	0.0135678
101109461	NUFIP2	11.0034	15.8857	5.49692	2.79798	4.35676	3.74438	10.7954	3.63304	-1.57116	0.0129	0.0470394
101102568	NUS1	23.74	10.778	5.5215	5.87109	3.69546	2.84298	13.3465	4.13651	-1.68998	0.0051	0.030182
101112690	NXPE3	3.70251	21.129	2.21843	2.02961	1.66538	2.84719	9.01665	2.18073	-2.04778	0.00945	0.0413509
105602911	OAS1	7.41529	3.34215	5.96822	50.7254	15.6795	13.01	5.57522	26.4717	2.24735	0.01165	0.0441538
101102632	OSR1	1.17693	10.5304	21.3671	46.6126	39.841	30.7155	11.0248	39.0564	1.82481	0.0028	0.02128
101121263	OSTC	371.225	85.3143	85.0134	58.1848	76.4374	41.4384	180.518	58.6868	-1.62103	0.00915	0.0411607
101116374	P4HA1	27.6755	14.6479	15.0547	7.86415	8.49428	5.82086	19.126	7.3931	-1.37129	0.01105	0.0438357
101112826	PAG1	5.07302	0.834153	1.89447	0.248498	0.671804	0.757251	2.60055	0.559184	-2.21742	0.00055	0.00802222
101123517	PAK2	26.6955	11.4754	7.85559	5.73748	5.83963	5.83122	15.3422	5.80278	-1.40269	0.01135	0.0438219
101109798	PALM	4.50738	6.37588	13.1603	67.4938	14.1049	19.7168	8.01453	33.7718	2.07513	0.0073	0.0367289
101118176	PARVB	20.1422	1.17208	4.21362	2.40611	0.798165	0.956924	8.5093	1.38706	-2.61701	0.00155	0.0143474
101121291	PDE3B	2.98639	2.50097	2.57884	22.0666	3.02331	3.15496	2.68873	9.41497	1.80803	0.0079	0.037899
101108929	PDK2	7.97801	7.55717	7.96472	39.3318	11.6921	20.6319	7.8333	23.8853	1.60843	0.009	0.0406125
101112240	PDPN	126.553	6.61124	20.6227	7.48858	10.1278	8.59921	51.2624	8.73852	-2.55244	0.00225	0.0187803
100505405	PEG3	0.773914	2.11489	2.67042	8.14604	7.91342	6.44772	1.85308	7.50239	2.01743	0.00165	0.0148912
101108799	PER2	1.47381	5.12307	6.06149	49.8202	3.4953	13.0425	4.21946	22.1193	2.39018	0.00145	0.013775
101110626	PFKFB4	3.19857	14.6648	2.63954	109.892	6.19746	11.1218	6.83431	42.4038	2.63333	0.0133	0.0475376
443245	PGF	0.916308	0.795601	2.022	20.7942	3.98883	5.22555	1.24464	10.0028	3.00661	0.0003	0.005415
101108630	PGM5	0.621734	6.984	5.37853	54.1966	6.1119	8.29163	4.32809	22.8667	2.40145	0.00255	0.0202319
100272002	PIM1	33.5888	35.349	5.93858	4.63232	3.8636	5.7665	24.9588	4.75414	-2.39229	0.00015	0.0038
100302501	PLAU	61.8429	26.1843	18.4872	11.7131	11.233	9.7061	35.5048	10.8841	-1.7058	0.00425	0.0276441
101122126	PLCG2	16.0419	1.66333	4.66166	0.647062	2.93099	2.94673	7.45562	2.17493	-1.77736	0.00805	0.0383637
101110218	PLEK	26.3083	4.05091	3.78636	2.17567	1.52145	1.72344	11.3818	1.80685	-2.65518	0.0003	0.00555385
101106582	PLXNC1	25.4	3.11353	5.08106	0.266262	2.37115	2.0837	11.1982	1.5737	-2.83103	0.00015	0.00373448
101102359	PMAIP1	23.1871	6.32215	5.26256	1.6827	3.35818	3.09947	11.5906	2.71345	-2.09476	0.00225	0.0188895
101105064	PNP	59.4513	81.7701	18.306	14.9084	20.3606	16.7868	53.1758	17.3519	-1.61567	0.0053	0.0309846
101123044	POLE2	16.3196	5.63494	3.38095	1.07922	2.06901	1.71034	8.44517	1.61952	-2.38256	0.0014	0.0134773
101107727	POU2AF1	141.638	13.7585	19.4241	1.30697	4.78601	2.90908	58.2736	3.00069	-4.27948	0.00025	0.00523188
101105799	PPA1	50.6861	138.83	32.2867	21.4607	31.6193	18.226	73.9343	23.7687	-1.63718	0.0093	0.0414481
101104034	PPL	0.565888	4.96273	9.42992	26.6922	11.1578	14.3541	4.98618	17.4014	1.8032	0.00365	0.0248613
101103077	PPP1R1B	1.29918	13.8149	12.8425	367.127	24.8432	36.0216	9.31884	142.664	3.93633	0.0011	0.0122185
101113890	PPP4R2	17.6154	18.3084	9.48176	2.8791	7.52013	5.00383	15.1352	5.13435	-1.55966	0.0094	0.0415095
101119892	PQLC3	30.813	6.61736	9.76775	4.58367	5.04949	5.41899	15.7327	5.01739	-1.64876	0.0088	0.0400858
101121017	PRDM1	31.554	4.23732	4.49205	0.801154	2.76806	3.06831	13.4278	2.21251	-2.60147	0.00235	0.0193909
101118410	PRKCB	23.9072	3.62493	4.4277	0.673633	1.55597	2.80301	10.6533	1.67754	-2.66688	0.00145	0.0138662
101107197	PROM1	0.32591	2.25623	3.52394	0.551276	8.86149	15.4633	2.03536	8.29204	2.02644	0.01065	0.0434424
101113754	PRR16	3.86588	19.2296	1.7294	0.249521	2.22287	1.66039	8.27497	1.37759	-2.5866	0.00125	0.0131752
100145875	PSPH	152.109	300.2	23.6703	47.6211	9.36443	3.90672	158.66	20.2974	-2.96657	0.00025	0.00515714
101105722	PTAR1	3.72167	6.18781	2.11925	0.768845	1.45895	1.08848	4.00958	1.10543	-1.85885	0.00295	0.0221865
101104734	PTPRO	4.61345	1.04908	1.26564	0.224164	0.744108	0.548973	2.30939	0.505748	-2.19102	0.0092	0.0412571
100034672	PTX3	38.2952	109.544	33.7588	8.47814	11.8104	9.5272	60.5327	9.93859	-2.6066	0.0001	0.00294694
101113161	PYCR1	63.9511	107.008	30.1836	12.3921	17.8115	5.10275	67.0476	11.7688	-2.51022	5e-05	0.00257857
101104195	RAB31	109.246	12.6807	22.2176	11.1207	12.4058	11.5195	48.048	11.682	-2.04019	0.0088	0.0402127
101105602	RAB33B	15.44	13.6253	4.89692	2.68549	3.95282	3.62632	11.3207	3.42154	-1.72625	0.0101	0.0426444
101108303	RAPGEF5	2.86096	5.22626	1.79834	0.818265	1.43265	0.879385	3.29519	1.04343	-1.65902	0.0078	0.037796
101107654	RARRES1	88.6113	9.31124	8.28204	8.14909	3.49864	1.94087	35.4015	4.52953	-2.96638	0.001	0.0117398
101108362	RASA2	5.55894	8.81569	4.53018	0.54875	3.10012	2.80296	6.3016	2.15061	-1.55097	0.0121	0.0451483
100302075	RASD1	0.672259	3.42358	2.04238	91.3685	3.92641	9.67721	2.04607	34.9907	4.09604	0.00015	0.00355082
101101969	RASGRP3	14.7974	5.47539	4.21083	1.18145	4.31374	2.00673	8.1612	2.50064	-1.70648	0.0075	0.0372165
101108977	RBP1	52.9504	257.334	44.9108	27.7743	47.1257	16.0331	118.398	30.3111	-1.96573	0.00265	0.0206843
100302062	REM1	1.66017	3.00588	6.72092	12.4128	7.93554	13.0745	3.79566	11.1409	1.55345	0.0104	0.0429074
101123221	RGS18	33.9225	1.70137	1.97274	0.109113	0.498044	0.264471	12.5322	0.290543	-5.43075	5e-05	0.00248966
101110554	RGS5	12.324	21.6285	4.08305	2.59632	4.25998	3.14406	12.6785	3.33345	-1.9273	0.0048	0.0292456
101123556	RHOBTB3	91.1497	29.8963	17.154	21.0743	9.21138	9.36663	46.0667	13.2174	-1.80128	0.0059	0.0325176
101113356	RINL	19.8135	0.937493	2.38526	1.13696	1.59945	1.66724	7.7121	1.46788	-2.39339	0.0015	0.0140649
101106782	RNFT1	48.4129	62.1432	23.9794	9.38998	14.6125	13.5275	44.8452	12.51	-1.84187	0.00125	0.0132721
101117207	RPL22L1	371.419	306.954	73.5112	40.4369	92.8468	43.7505	250.628	59.0114	-2.08648	0.00295	0.0220715
101111428	RPS6KA3	11.6312	27.1746	6.76764	1.85422	5.60943	4.20082	15.1912	3.88816	-1.96608	0.00665	0.034792
101104256	RTN4RL1	0.323982	0.792901	0.97797	14.7668	1.12637	4.7523	0.698284	6.88182	3.3009	5e-05	0.00156957
101104026	S100A8	2044.38	20.2363	408.289	3.34258	4.88016	1.69772	824.302	3.30682	-7.96158	5e-05	0.00240667
101122157	S100A9	2091.15	97.5924	341.274	21.5205	26.6852	14.2692	843.339	20.825	-5.33973	5e-05	0.00232903
101117716	SAMSN1	38.4876	3.46902	3.98763	0.465665	1.12745	1.1363	15.3148	0.909805	-4.07322	5e-05	0.00225625
101103565	SAR1B	28.5986	19.0599	7.59799	8.21197	4.88014	4.04394	18.4189	5.71202	-1.68911	0.00435	0.0279173
101115992	SDF2L1	139.554	139.408	48.054	20.942	35.2448	21.5813	109.005	25.9227	-2.07211	0.0115	0.0441649
101112348	SDS	110.977	34.7623	7.32689	3.48016	2.38201	4.30861	51.022	3.39026	-3.91165	5e-05	0.00218788
101112089	SDSL	8.68865	36.6215	0.19084	4.06643	0.129508	0.18832	15.167	1.46142	-3.37549	0.00425	0.0275202
101116789	SEC11C	362.164	401.989	73.8328	88.218	56.2121	61.6222	279.328	68.6841	-2.02391	0.00185	0.016389
101118786	SEC24A	15.1915	13.08	4.982	1.23529	3.86332	3.87403	11.0845	2.99088	-1.8899	0.00835	0.0394033
101119522	SEC62	27.2755	95.2507	15.9975	6.30128	11.0277	11.0511	46.1746	9.46	-2.28719	0.0076	0.0374553
101112399	SEL1L	82.3161	29.3304	23.4588	9.95842	12.5015	12.3727	45.0351	11.6109	-1.95557	0.0041	0.0271578
443127	SELE	1.30709	0.420668	2.03025	0.224847	0.240446	0.027409	1.25267	0.164234	-2.93118	0.00675	0.0350612
101102284	SERP1	133.508	110.48	40.2762	30.85	22.5654	23.6323	94.7547	25.6825	-1.88341	0.00735	0.0368521
100381267	SERPINE1	10.8326	1.03478	6.86379	1.88034	0.623878	1.18667	6.24372	1.2303	-2.3434	0.001	0.0116452
101105338	SERTM1	14.0297	9.43682	3.87701	2.64597	2.77637	3.69698	9.11452	3.03977	-1.5842	0.00765	0.0375735
101110659	SESN2	7.22102	19.9828	2.9171	5.60003	1.92799	1.5385	10.0403	3.02217	-1.73215	0.01175	0.0443003
101121066	SFRP1	102.554	12.4466	52.0554	10.0314	15.4693	21.553	55.6853	15.6846	-1.82795	0.0096	0.0415042
101109845	SFRP5	0.0231889	1.88672	0.576375	516.151	2.38153	8.49959	0.82876	175.677	7.72776	0.00045	0.00691277
101110388	SH3KBP1	14.5888	2.86907	5.5873	1.1664	3.93131	2.96789	7.68173	2.68853	-1.51461	0.0142	0.0491722
101110959	SIGLEC1	0.877667	0.349624	0.94579	4.69728	1.82074	2.13806	0.72436	2.88536	1.99397	0.00245	0.0197642
101121221	SLAMF7	85.3777	6.54898	7.39309	0.67089	4.08633	6.05223	33.1066	3.60315	-3.19979	5e-05	0.00212353
101110694	SLC17A9	35.3174	25.6868	7.79316	1.60345	3.77072	2.99828	22.9325	2.79082	-3.03863	5e-05	0.00206286
101113480	SLC1A4	40.8897	16.3604	3.51317	2.16056	1.20546	1.46703	20.2544	1.61101	-3.6522	5e-05	0.00200556
101122806	SLC24A3	0.49859	4.94874	5.66572	31.2284	13.3691	10.5227	3.70435	18.3734	2.31033	0.00115	0.0123925
100147780	SLC25A33	3.00097	12.7839	5.94712	75.4699	8.7764	8.15136	7.244	30.7992	2.08804	0.0053	0.0308597
443507	SLC2A5	9.25659	2.10783	1.52462	0.0919983	1.48467	1.62885	4.29634	1.0685	-2.00752	0.0125	0.0459288
100302550	SLC30A7	16.9425	9.28378	4.34917	1.83259	2.943	2.37673	10.1918	2.38411	-2.09589	0.0004	0.00671628
101113465	SLC38A5	21.3275	1.5293	1.5255	0.0817713	0.295761	0.471281	8.12743	0.282938	-4.84424	5e-05	0.00195135
101105333	SLC38A6	18.4331	4.53052	3.05018	2.87576	3.47373	2.33123	8.67126	2.89357	-1.58339	0.0104	0.0432784
101116017	SLC39A14	40.8272	113.116	9.37822	9.18247	9.68146	14.7618	54.4405	11.2086	-2.28007	0.0104	0.0430304
101108488	SLC39A8	21.4204	495.467	6.24841	2.10991	5.19444	3.21025	174.379	3.50486	-5.63672	0.0059	0.0327677
101108183	SLC6A9	31.8739	11.9303	6.2917	1.84555	2.45173	1.62693	16.6986	1.97474	-3.08	0.001	0.011552
100820755	SLC7A11	10.2184	15.6467	0.784447	0.155333	0.114577	0.0824792	8.88321	0.117463	-6.2408	5e-05	0.0019
641306	SLPI	3483.46	2.03233	20.744	0.855508	0.0579418	0.41184	1168.75	0.441763	-11.3694	0.00035	0.00601667
101120499	SMPDL3A	25.4948	1.36953	2.89204	0.718038	2.10987	2.80372	9.91878	1.87721	-2.40158	0.0022	0.0185778
101121363	SOAT1	19.4464	8.32172	4.82868	3.22787	2.10378	2.81813	10.8656	2.71659	-1.9999	0.0009	0.0110136
100294595	SOCS3	39.9305	6.34856	3.88965	5.57911	1.31239	1.84679	16.7229	2.91276	-2.52137	0.00545	0.0313538
101115280	SORD	6.18875	8.31562	7.92519	60.4901	9.42255	10.2308	7.47652	26.7145	1.83718	0.00785	0.037911
101118688	SPATS2	10.2986	10.3056	3.85023	1.45283	3.44353	2.1044	8.15147	2.33359	-1.80451	0.00215	0.0183704
101105386	SPCS3	152.698	32.7695	20.4882	28.7305	15.496	11.4134	68.6518	18.5466	-1.88814	0.00135	0.0137282
101118982	SPON1	63.5613	3.67348	17.6839	2.87609	8.47246	3.93178	28.3062	5.09344	-2.47441	0.00325	0.0235829
443058	SPP1	233.888	7395.84	326.611	0.9568	41.2304	13.2889	280.25	18.492	-7.16409	5e-05	0.00185128
101108055	SPPL2A	47.7328	52.8612	13.4537	8.71232	12.3298	11.2918	38.0159	10.778	-1.81852	0.0134	0.0476591
101107327	SRGN	464.784	41.9717	56.8391	44.7133	24.0517	36.3629	187.865	35.0427	-2.42251	0.00165	0.0150797
101118904	SRP54	50.0847	34.9532	19.0468	7.70941	10.7619	8.09848	34.6949	8.85661	-1.9699	0.0006	0.00817358
101114618	SRSF12	12.3545	2.61155	2.37566	0.295753	1.27635	1.01755	5.78057	0.863217	-2.74342	0.0008	0.010223
101112314	ST8SIA4	6.16688	5.03949	2.54061	0.778848	1.50113	1.96937	4.58233	1.41645	-1.6938	0.0065	0.0342555
101103080	STAC2	1.20856	0.781711	1.12357	4.45357	1.22862	10.4815	1.03795	5.38791	2.37599	0.0011	0.0121252
101115032	STAP1	4.87713	0.474607	1.26065	0.417679	0.37961	0.323769	2.20413	0.373686	-2.56031	0.00605	0.0329668
101111709	STEAP1	37.3974	7.74462	9.44143	4.15553	7.00976	6.72484	18.1945	5.96337	-1.6093	0.00985	0.0418335
101113888	STXBP6	15.5312	4.79414	2.87996	3.91126	1.81799	1.9134	7.73509	2.54755	-1.60231	0.00715	0.0363542
101108241	SUCO	14.0195	25.3886	3.82992	1.40492	3.17406	3.49716	14.4126	2.69205	-2.42056	0.0006	0.0080972
101121153	SUSD1	2.40918	11.352	1.23124	0.330753	0.49071	0.608825	4.99747	0.476763	-3.38985	0.00045	0.00706304
101108632	TANK	13.1253	8.18629	5.10244	1.20016	3.44104	3.48315	8.80466	2.70812	-1.70098	0.01265	0.0463619
101114306	TARS	60.1881	123.221	25.0665	13.4228	17.8308	11.0256	69.4918	14.0931	-2.30186	0.0022	0.0186871
101122098	TBC1D15	18.2915	13.7697	6.41365	2.55154	4.65483	4.38838	12.825	3.86492	-1.73044	0.00415	0.0271158
101120538	TCF4	16.6291	8.00525	8.64507	1.88961	5.71364	5.00943	11.0931	4.20422	-1.39976	0.01355	0.0479564
101119806	THAP2	6.5065	3.90706	3.1749	0.865095	1.72942	1.66847	4.52948	1.42099	-1.67245	0.00975	0.0416538
101116840	THBS2	18.7043	1.05795	35.6303	8.6567	2.32741	2.97626	18.4642	4.65346	-1.98835	0.00565	0.0319945
101118103	TIGD2	8.73411	3.24554	2.4809	0.469729	1.80674	1.66094	4.82018	1.31247	-1.8768	0.0027	0.0207383
554262	TLR2	24.7802	17.2211	7.01565	2.45066	5.58497	2.2941	16.339	3.44324	-2.24648	0.00015	0.00367119
554257	TLR6	6.58629	3.67545	1.43778	0.521185	1.56459	1.22304	3.89984	1.10294	-1.82206	0.01115	0.0436331
554254	TLR7	15.1023	2.55061	3.31409	1.84581	1.54465	1.9644	6.98899	1.78495	-1.9692	0.00195	0.0169627
554259	TLR8	4.96799	1.36169	1.92861	0.455437	0.672446	0.683121	2.75276	0.603668	-2.18905	0.00165	0.0149849
101122854	TMEM106B	16.4593	8.35259	3.9398	2.74743	3.21078	3.72348	9.58391	3.22723	-1.57032	0.006	0.032943
101102841	TMEM119	20.3205	12.3209	12.7824	0.869809	5.45842	1.89678	15.1413	2.74167	-2.46536	0.008	0.0382517
101120860	TMEM123	81.4522	14.9479	19.0427	7.99517	17.6935	12.4123	38.4809	12.7003	-1.59928	0.00515	0.0303535
101121193	TMEM150B	18.6218	1.48007	2.2181	0.853874	0.954173	0.799102	7.43998	0.86905	-3.09779	0.0007	0.00918909
101107021	TMEM165	95.6565	20.1365	18.5985	13.9774	17.2367	13.806	44.7972	15.0067	-1.5778	0.0035	0.0242981
101102233	TMEM167A	47.966	31.9951	11.7947	15.1158	11.0124	7.23198	30.5853	11.12	-1.45967	0.0112	0.0437103
101116978	TMEM263	38.1516	15.3321	10.8728	3.46769	6.34539	4.47444	21.4522	4.76251	-2.17133	0.00025	0.00508451
101118275	TMEM33	25.4137	19.6719	7.20506	5.6137	6.38889	4.94076	17.4302	5.64778	-1.62583	0.00715	0.0362267
101116869	TMF1	7.04564	9.8167	3.90536	0.926667	2.36891	2.46144	6.92257	1.91901	-1.85095	0.00355	0.0244105
101122200	TNFRSF13B	18.6967	4.52469	3.46825	0.883382	2.06497	1.63668	8.89654	1.52834	-2.54127	0.0058	0.0325883
101102699	TNFSF8	10.043	2.10522	2.57382	0.359482	1.37481	1.76792	4.90735	1.1674	-2.07164	0.00325	0.023702
101110224	TNS2	11.5801	21.5556	15.4105	118.035	19.5268	28.2766	16.1821	55.2796	1.77235	0.0086	0.0400594
101120591	TOM1L1	10.6319	62.7704	6.16441	4.39821	7.42367	8.55152	26.5222	6.79113	-1.96548	0.01065	0.0435654
101112068	TPD52	134.373	118.202	28.233	5.7495	25.2161	24.9643	93.6026	18.6433	-2.32789	0.0014	0.0136595
101114410	TRABD2B	0.430788	0.563996	2.22753	8.88329	1.65445	1.91495	1.0741	4.1509	1.95029	0.00625	0.0334259
101104503	TRAM1	459.023	203.43	76.327	40.8361	52.2325	45.3532	246.26	46.1406	-2.41607	0.00105	0.0119386
101102400	TRIB1	30.0508	61.4476	7.41238	8.84559	5.59678	7.66706	32.9703	7.36981	-2.16147	0.00205	0.0177257
101101881	TST	6.36285	26.829	46.2172	65.8664	79.8535	168.479	26.4697	104.733	1.9843	0.00125	0.0130797
101112744	TUSC5	0.231297	0.838361	1.62257	469.314	6.22548	1.90551	0.897408	159.148	7.47039	0.00095	0.0113372
101114765	TWF1	15.1794	21.471	10.1208	3.08082	8.18017	4.70081	15.5904	5.3206	-1.551	0.0137	0.0482507
101110601	UBE2J1	162.319	27.422	24.739	7.22385	13.3491	9.77715	71.4932	10.1167	-2.82107	0.0001	0.002888
101116293	UBXN11	0.842169	1.2516	2.23513	5.11641	3.27837	6.04043	1.44297	4.81174	1.73752	0.00765	0.0373196
101117250	UCHL1	1.32184	0.280739	1.33932	3.97622	6.58855	5.31212	0.980635	5.2923	2.43211	0.0054	0.0311904
101106268	UFL1	13.2693	18.8421	7.53679	1.66635	4.9337	4.11772	13.216	3.57259	-1.88725	0.0026	0.0205158
101102155	UFM1	62.1964	40.1508	16.2968	7.70372	8.5951	7.10838	39.548	7.8024	-2.34161	0.0001	0.00283137
101107953	UPP1	35.9177	3.85455	6.07678	1.16929	3.48341	1.66896	15.283	2.10722	-2.85852	0.00055	0.007942
101107444	USO1	22.0727	26.8549	13.2734	2.55151	7.93658	6.30847	20.7337	5.59885	-1.88877	0.001	0.0114603
100307050	VAMP7	35.4466	14.9012	8.03198	8.61381	5.80434	5.8445	19.4599	6.75422	-1.52664	0.0053	0.0311106
101109045	VIMP	180.874	147.961	54.2078	62.8165	37.6289	41.5069	127.681	47.3175	-1.4321	0.01115	0.0437516
101123022	VIT	0.201656	2.89915	4.10205	10.4052	7.55855	9.28936	2.40095	9.08436	1.91978	0.00335	0.0237127
101118561	VPREB3	18.5602	2.06158	3.54019	0.98002	0.996853	0.985237	8.054	0.98737	-3.02804	0.01015	0.0426064
101116120	VSTM4	2.87473	1.1293	2.89002	18.9879	3.73373	3.79237	2.29802	8.83799	1.94333	0.0025	0.0200556
101110390	WIPF1	65.6657	5.40125	13.1135	5.88944	6.9385	9.30083	28.0601	7.37626	-1.92756	0.0026	0.0204043
101111048	WNT11	0.65997	0.577685	1.57724	20.0377	1.21152	3.658	0.938297	8.30239	3.14541	0.0004	0.00663908
101110588	YIPF5	93.2357	37.8664	27.9297	27.728	19.8159	16.8274	53.0106	21.4571	-1.30483	0.0142	0.0490545
101119065	YOD1	5.45671	7.21912	3.24775	1.04398	2.34603	1.89589	5.30786	1.76197	-1.59094	0.0113	0.0437458
101103586	ZHX3	1.52042	2.82627	3.69915	16.2178	3.68845	6.137	2.68195	8.68108	1.69459	0.01165	0.04427
101106029	ZNF575	2.00767	3.4948	6.2448	17.5227	8.98841	9.97386	3.91576	12.1617	1.63498	0.00965	0.041349
101109172	ZNF775	9.25472	1.77044	5.90147	41.3369	8.92041	12.513	5.64221	20.9235	1.89079	0.01355	0.0478391
