# Supplementary material for: Digital gene expression analyses of mammary glands from meat ewes naturally infected with clinical mastitis
Source: R Soc Open Sci. 2019 Jul 3;6(7):181604. doi: 10.1098/rsos.181604 (PMC6689637; doi:10.1098/rsos.181604)
Supplement: Table S5 [file rsos181604supp5.xlsx]

## Sheet: Sheet1
Journal Name: Royal Society Open Science Digital gene expression analyses of mammary glands from meat ewes naturally infected with clinical mastitis Taotao Li1, Jianfeng Gao1, Xingxu Zhao2 and Youji Ma1* 1 College of Animal Science and Technology, and 2 College of Veterinary Medicine, Gansu Agricultural University, Lanzhou, People’s Republic of China
Table S5. KEGG pathway enrichment results of DEGs between HMTs and CMMTs.
Terms	Count	%	Corrected pValue	Genes
Phagosome	16	0.0846561	9.35633e-05	101121746, 101108962, 554257, 105605927, 101113725, 443475, 105606081, 101120148, 554262, 101116840, 101111946, 101103133, 443143, 101108131, 100036757, 101106094
Protein processing in endoplasmic reticulum	14	0.0818713	0.000305115	101104503, 101110601, 101104137, 101119065, 101110685, 101118786, 101110877, 101103565, 101109883, 101112399, 101122164, 101103326, 101119522, 101110042
B cell receptor signaling pathway	9	0.128571	0.000315702	101118410, 101111510, 101101969, 101122126, 101114005, 101111241, 101105725, 101105681, 101104586
NF-kappa B signaling pathway	9	0.0978261	0.00165533	101118410, 101108235, 101122126, 101114560, 101111241, 101105725, 101120189, 100302501, 101119957
Primary immunodeficiency	6	0.166667	0.00190017	101111510, 101122200, 101103538, 101111241, 101105725, 101105681
Metabolic pathways	41	0.0309668	0.00480748	101106659, 101113458, 101123204, 101123044, 100189620, 101120567, 101113161, 101106654, 101103326, 101117878, 101122583, 443089, 101121628, 101105064, 443485, 101109849, 105616883, 101112089, 101116572, 101108665, 101118587, 100145875, 101119850, 101102664, 101120807, 101107953, 101108820, 101114312, 101122126, 101116374, 101112348, 101108520, 101102378, 101104557, 101106892, 101101881, 101115280…
Staphylococcus aureus infection	7	0.0958904	0.00684093	101108962, 443475, 105605927, 101120148, 101111946, 101103133, 101108131
Complement and coagulation cascades	8	0.0824742	0.00684093	101120257, 443475, 105605927, 100381267, 101111946, 101103133, 100302501, 101108131
Focal adhesion	12	0.0566038	0.00689526	443483, 101118410, 780519, 443058, 105606081, 101115445, 101123517, 443245, 101118176, 101120189, 443143, 101116840
Cytokine-cytokine receptor interaction	13	0.0524194	0.00752814	101111100, 101110214, 101122200, 101102699, 101103538, 443175, 101117706, 101120093, 101118070, 101117971, 101103308, 101119957, 101114260
Protein export	4	0.190476	0.00988959	101105386, 101119522, 101118904, 101116789
Pyrimidine metabolism	7	0.0707071	0.0213571	101106892, 101107953, 101123044, 101109849, 101102378, 101105064, 101102664
Chemokine signaling pathway	9	0.0511364	0.0359795	101118410, 101114005, 101111100, 101110214, 101117706, 101120093, 101117971, 101103238, 101119957
ECM-receptor interaction	6	0.0652174	0.0480411	443483, 443058, 105606081, 101115445, 101116840, 443143
Toll-like receptor signaling pathway	6	0.0571429	0.0493245	554254, 554257, 101108235, 554259, 443058, 554262
HMTs: healthy mammary tissues; CMMTS: clinical mastitic mammary tissues.
